# Supplementary material for: Genome Analysis of Epsilon CrAss-like Phages
Source: MDPI journal article supplement (doi:10.3390/v16040513), 2024-03-27
Supplement: s1 [file s1]

**Table S2:** List of the epsilon crAss-like phages noted in Figures 2, 3, 4

| #   | GenBank accession number | Isolate       | Length, bp |
|-----|--------------------------|---------------|------------|
| 1.  | OR575929                 | crAssE-Sib    | 151256     |
| 2.  | OP074661                 | 2523_57290    | 152120     |
| 3.  | OP072923                 | PF-P004_88583 | 146609     |
| 4.  | OP072905                 | 4298_68366    | 150730     |
| 5.  | BK053219                 | ctCP22        | 155962     |
| 6.  | OP074781                 | 2657_49232    | 145370     |
| 7.  | OP075230                 | 3126_50468    | 149939     |
| 8.  | OP076321                 | 1914_29733    | 148608     |
| 9.  | OP030796                 | 0498_72044    | 150546     |
| 10. | OP075812                 | 3801_30080    | 152036     |
| 11. | OP075003                 | 2901_48968    | 156437     |
| 12. | OP030781                 | 0359_54031    | 147673     |
| 13. | OP073967                 | 1482_59065    | 157702     |
| 14. | OP075874                 | 3870_22255    | 151190     |
| 15. | OP075824                 | 3814_49619    | 156965     |
| 16. | OP072453                 | 2917_22467    | 144605     |
| 17. | OP075288                 | 3192_57230    | 151983     |
| 18. | OP076183                 | 4254_70450    | 147544     |
| 19. | OP072437                 | 2884_41581    | 147208     |
| 20. | OP074405                 | 2207_27220    | 144250     |
| 21. | BK053219                 | ctCP22        | 155962     |
| 22. | BK023142                 | ctVE36        | 158714     |
| 23. | BK031280                 | ctfN46        | 144113     |
| 24. | BK027871                 | ctqVY12       | 144367     |
| 25. | BK038654                 | ct8FW29       | 148799     |
| 26. | BK048677                 | ctH0215       | 151346     |
| 27. | BK052849                 | ctvdV13       | 158723     |
| 28. | BK037909                 | ctsIE2        | 156641     |
| 29. | BK057374                 | ctR3g24       | 151391     |
| 30. | OFPS01000054             | OFPS01000054  | 144391     |
| 31. | OICR01000007             | OICR01000007  | 146329     |
| 32. | OMGY01000027             | OMGY01000027  | 147101     |
| 33. | OFLY01000012             | OFLY01000012  | 147368     |
| 34. | OLJW01000056             | OLJW01000056  | 148853     |
| 35. | OJUG01000072             | OJUG01000072  | 148883     |
| 36. | OJSE01000052             | OJSE01000052  | 148953     |
| 37. | OHXK01000005             | OHXK01000005  | 149835     |
| 38. | OGZF01000025             | OGZF01000025  | 150604     |
| 39. | OHBE01000017             | OHBE01000017  | 150646     |
| 40. | OMDY01000016             | OMDY01000016  | 151112     |
| 41. | OLZO01000021             | OLZO01000021  | 151133     |
| 42. | OIWQ01000029             | OIWQ01000029  | 151719     |
| 43. | OHMY01000035             | OHMY01000035  | 151909     |
| 44. | OHKV01000027             | OHKV01000027  | 151910     |
| 45. | OHQS01000030             | OHQS01000030  | 151910     |
| 46. | OCHF01000011             | OCHF01000011  | 151921     |
| 47. | OCPY01000015             | OCPY01000015  | 151921     |
| 48. | OCPZ01000017             | OCPZ01000017  | 151921     |

|     |              |              |        |
|-----|--------------|--------------|--------|
| 49. | OGOO01000044 | OGOO01000044 | 151997 |
| 50. | OIZE01000030 | OIZE01000030 | 152163 |
| 51. | OHEN01000023 | OHEN01000023 | 152275 |
| 52. | OIAT01000008 | OIAT01000008 | 152556 |
| 53. | OFMT01000022 | OFMT01000022 | 153190 |
| 54. | OJOU01000011 | OJOU01000011 | 153255 |
| 55. | OFMU01000028 | OFMU01000028 | 153731 |
| 56. | OBWI01000023 | OBWI01000023 | 153977 |
| 57. | PPYF01266999 | PPYF01266999 | 154058 |
| 58. | OICG01000006 | OICG01000006 | 154154 |
| 59. | OLOZ01000027 | OLOZ01000027 | 154420 |
| 60. | OGZB01000001 | OGZB01000001 | 154871 |
| 61. | OLOG01000029 | OLOG01000029 | 155271 |
| 62. | OLQV01000028 | OLQV01000028 | 156426 |
| 63. | OGZF01000022 | OGZF01000022 | 158368 |
| 64. | OHYE01000011 | OHYE01000011 | 158763 |
| 65. | OJQQ01000027 | OJQQ01000027 | 158910 |
