# Supplementary material for: Genome Analysis of Epsilon CrAss-like Phages
Source: MDPI journal article supplement (doi:10.3390/v16040513), 2024-03-27
Supplement: s1 [file s1]

**Table S1:** Annotation of the crAssE-Sib genome

| #   | Putative product                        | Coordinates, bp | Length, bp | Direction | Type |
|-----|-----------------------------------------|-----------------|------------|-----------|------|
| 1.  | hypothetical protein                    | 83..289         | 207        | -         | CDS  |
| 2.  | hypothetical protein                    | 312..482        | 171        | -         | CDS  |
| 3.  | hypothetical protein                    | 556..843        | 288        | -         | CDS  |
| 4.  | hypothetical protein                    | 1038..1577      | 540        | -         | CDS  |
| 5.  | hypothetical protein                    | 1938..2105      | 168        | -         | CDS  |
| 6.  | hypothetical protein                    | 2226..2618      | 393        | -         | CDS  |
| 7.  | Phosphodiesterase                       | 2615..3571      | 957        | -         | CDS  |
| 8.  | Polynucleotide kinase, 3<br>phosphatase | 3537..4409      | 873        | -         | CDS  |
| 9.  | hypothetical protein                    | 4409..4819      | 411        | -         | CDS  |
| 10. | xyloglucanase                           | 5004..5660      | 657        | +         | CDS  |
| 11. | putative DNA binding<br>protein         | 5691..5960      | 270        | -         | CDS  |
| 12. | MmcB-like DNA repair<br>protein         | 5957..6649      | 693        | -         | CDS  |
| 13. | tRNA                                    | 6667..6738      | 72         | -         | tRNA |
| 14. | tRNA                                    | 6742..6813      | 72         | -         | tRNA |
| 15. | tRNA                                    | 6883..6953      | 71         | -         | tRNA |
| 16. | tRNA                                    | 6955..7027      | 73         | -         | tRNA |
| 17. | ATPase                                  | 7173..7898      | 726        | -         | CDS  |
| 18. | dUTPase                                 | 7923..8573      | 651        | -         | CDS  |
| 19. | hypothetical protein                    | 8576..8824      | 249        | -         | CDS  |
| 20. | ssDNA binding protein                   | 8880..9827      | 948        | -         | CDS  |
| 21. | DNA polymerase III<br>subunit beta      | 9840..10,949    | 1110       | -         | CDS  |
| 22. | Holliday junction resolvase             | 11,047..11,580  | 534        | -         | CDS  |
| 23. | hypothetical protein                    | 11,587..12,021  | 435        | -         | CDS  |
| 24. | hypothetical protein                    | 12,018..12,266  | 249        | -         | CDS  |
| 25. | hypothetical protein                    | 12,271..12,573  | 303        | -         | CDS  |
| 26. | Thymidylate synthase                    | 12,570..13,442  | 873        | -         | CDS  |
| 27. | putative DNA binding<br>protein         | 13,518..13,718  | 201        | -         | CDS  |
| 28. | DUF2829 domain-<br>containing protein   | 13,792..14,061  | 270        | -         | CDS  |
| 29. | ATP dependent DNA<br>helicase           | 14,114..15,541  | 1428       | -         | CDS  |
| 30. | hypothetical protein                    | 15,799..17,367  | 1569       | -         | CDS  |
| 31. | hypothetical protein                    | 17,421..17,633  | 213        | +         | CDS  |
| 32. | hypothetical protein                    | 17,717..18,157  | 441        | +         | CDS  |
| 33. | DNA-binding protein                     | 18,144..18,593  | 450        | +         | CDS  |
| 34. | HYDIN-like protein                      | 18,609..19,334  | 726        | +         | CDS  |
| 35. | hypothetical protein                    | 19,338..19,619  | 282        | +         | CDS  |
| 36. | hypothetical protein                    | 19,606..20,127  | 522        | +         | CDS  |
| 37. | putative terminase small<br>subunit     | 20,105..20,443  | 339        | +         | CDS  |
| 38. | Terminase large subunit                 | 20,406..23,219  | 2814       | +         | CDS  |
| 39. | Portal protein                          | 23,261..26,020  | 2760       | +         | CDS  |
| 40. | Structural protein                      | 26,147..27,313  | 1167       | +         | CDS  |
| 41. | Major capsid protein                    | 27,336..29,036  | 1701       | +         | CDS  |
| 42. | hypothetical protein                    | 29,112..30,200  | 1089       | +         | CDS  |

|     |                                             |                |      |   |         |
|-----|---------------------------------------------|----------------|------|---|---------|
| 43. | Ring protein                                | 30,204..30,878 | 675  | + | CDS     |
| 44. | Structural protein                          | 31,021..33,009 | 1989 | + | CDS     |
| 45. | hypothetical protein                        | 33,101..34,843 | 1743 | + | CDS     |
| 46. | Tetratricopeptide repeat family protein     | 34,828..35,139 | 312  | + | CDS     |
| 47. | Pentaxin family protein                     | 35,139..37,247 | 2109 | + | CDS     |
| 48. | hypothetical protein                        | 37,249..37,521 | 273  | + | CDS     |
| 49. | Putative structural protein                 | 37,607..37,825 | 219  | + | CDS     |
| 50. | Collagen triple helix repeat protein        | 37,829..38,878 | 1050 | + | CDS     |
| 51. | Carbohydrate binding domain protein         | 38,894..40,006 | 1113 | + | CDS     |
| 52. | Peptidase M15                               | 40,137..40,598 | 462  | + | CDS     |
| 53. | transmembrain protein                       | 40,600..41,187 | 588  | + | CDS     |
| 54. | hypothetical protein                        | 41,184..41,636 | 453  | + | CDS     |
| 55. | Structural protein                          | 41,720..42,598 | 879  | + | CDS     |
| 56. | hypothetical protein                        | 42,620..42,946 | 327  | + | CDS     |
| 57. | hypothetical protein                        | 42,948..43,199 | 252  | + | CDS     |
| 58. | Protein of unknown function DUF5977         | 43,196..43,834 | 639  | + | CDS     |
| 59. | receptor binding protein                    | 43,837..45,894 | 2058 | + | CDS     |
| 60. | VR                                          | 45,751..45,846 | 96   | + | feature |
| 61. | IMH                                         | 45,847..45,862 | 16   | + | feature |
| 62. | TR                                          | 46,215..46,310 | 96   | + | feature |
| 63. | IMH*                                        | 46,311..46,326 | 16   | + | feature |
| 64. | Reverse transcriptase                       | 46,419..47,816 | 1398 | + | CDS     |
| 65. | hypothetical protein                        | 47,838..48,230 | 393  | + | CDS     |
| 66. | hypothetical protein                        | 48,205..48,483 | 279  | + | CDS     |
| 67. | hypothetical protein                        | 48,467..48,892 | 426  | + | CDS     |
| 68. | hypothetical protein                        | 48,909..49,295 | 387  | + | CDS     |
| 69. | cellulase                                   | 49,312..50,091 | 780  | + | CDS     |
| 70. | Carbohydrate-binding protein                | 50,078..54,589 | 4512 | + | CDS     |
| 71. | hypothetical protein                        | 54,719..54,841 | 123  | + | CDS     |
| 72. | hypothetical protein                        | 54,904..55,320 | 417  | + | CDS     |
| 73. | hypothetical protein                        | 55,289..55,678 | 390  | + | CDS     |
| 74. | Ring protein                                | 55,675..56,379 | 705  | + | CDS     |
| 75. | hypothetical protein                        | 56,451..56,945 | 495  | + | CDS     |
| 76. | Phage antirepressor protein                 | 57,049..58,002 | 954  | + | CDS     |
| 77. | Ring protein                                | 58,086..58,982 | 897  | + | CDS     |
| 78. | RNA-guided endonuclease TnpB family protein | 58,986..60,125 | 1140 | - | CDS     |
| 79. | hypothetical protein                        | 60,269..60,433 | 165  | + | CDS     |
| 80. | Putative tail protein                       | 60,439..61,167 | 729  | + | CDS     |
| 81. | hypothetical protein                        | 61,172..62,305 | 1134 | + | CDS     |
| 82. | periplasmic metallopeptidase                | 62,289..62,750 | 462  | + | CDS     |
| 83. | hypothetical protein                        | 62,743..63,204 | 462  | + | CDS     |
| 84. | hypothetical protein                        | 63,285..64,007 | 723  | + | CDS     |
| 85. | hypothetical protein                        | 64,017..64,115 | 99   | + | CDS     |
| 86. | RNA-guided endonuclease TnpB family protein | 64,190..65,413 | 1224 | + | CDS     |

|      |                                       |                  |      |   |      |
|------|---------------------------------------|------------------|------|---|------|
| 87.  | Muzzle protein                        | 65,628..72,401   | 6774 | + | CDS  |
| 88.  | tRNA                                  | 72,756..72,828   | 73   | + | tRNA |
| 89.  | tRNA                                  | 72,901..72,974   | 74   | + | tRNA |
| 90.  | Ribonucleoprotein                     | 73,091..74,725   | 1635 | + | CDS  |
| 91.  | hypothetical protein                  | 74,851..75,264   | 414  | + | CDS  |
| 92.  | Phage tail lysozyme                   | 75,248..77,668   | 2421 | + | CDS  |
| 93.  | hypothetical protein                  | 78,420..79,439   | 1020 | + | CDS  |
| 94.  | Structural protein                    | 79,508..82,348   | 2841 | + | CDS  |
| 95.  | Structural protein                    | 82,426..85,407   | 2982 | + | CDS  |
| 96.  | Structural protein                    | 85,400..92,026   | 6627 | + | CDS  |
| 97.  | hypothetical protein                  | 92,029..92,607   | 579  | + | CDS  |
| 98.  | DNA-dependent RNA polymerase          | 92,650..94,908   | 2259 | + | CDS  |
| 99.  | Repressor protein                     | 95,129..95,353   | 225  | + | CDS  |
| 100. | Phage antirepressor protein           | 95,605..96,489   | 885  | + | CDS  |
| 101. | Spike protein/glycoprotein            | 96,609..97,673   | 1065 | + | CDS  |
| 102. | hypothetical protein                  | 97,697..98,110   | 414  | + | CDS  |
| 103. | hypothetical protein                  | 98,161..98,655   | 495  | + | CDS  |
| 104. | hypothetical protein                  | 98,663..99,040   | 378  | + | CDS  |
| 105. | hypothetical protein                  | 99,134..99,427   | 294  | + | CDS  |
| 106. | hypothetical protein                  | 99,370..99,549   | 180  | + | CDS  |
| 107. | DNA binding protein                   | 99,597..99,767   | 171  | + | CDS  |
| 108. | hypothetical protein                  | 99,896..100,123  | 228  | + | CDS  |
| 109. | hypothetical protein                  | 100,120..100,335 | 216  | + | CDS  |
| 110. | Protein of unknown function (DUF2829) | 100,391..101,146 | 756  | + | CDS  |
| 111. | hypothetical protein                  | 101,143..101,418 | 276  | + | CDS  |
| 112. | hypothetical protein                  | 101,422..101,727 | 306  | + | CDS  |
| 113. | hypothetical protein                  | 101,745..102,095 | 351  | + | CDS  |
| 114. | hypothetical protein                  | 102,092..102,409 | 318  | + | CDS  |
| 115. | hypothetical protein                  | 102,399..102,569 | 171  | + | CDS  |
| 116. | hypothetical protein                  | 102,590..102,943 | 354  | + | CDS  |
| 117. | hypothetical protein                  | 103,085..103,930 | 846  | + | CDS  |
| 118. | Structural protein                    | 103,830..109,487 | 5658 | + | CDS  |
| 119. | hypothetical protein                  | 109,702..110,319 | 618  | + | CDS  |
| 120. | hypothetical protein                  | 110,324..110,773 | 450  | + | CDS  |
| 121. | hypothetical protein                  | 110,888..111,136 | 249  | - | CDS  |
| 122. | hypothetical protein                  | 111,129..111,617 | 489  | - | CDS  |
| 123. | cell adhesive protein                 | 111,607..111,855 | 249  | - | CDS  |
| 124. | hypothetical protein                  | 111,863..112,054 | 192  | - | CDS  |
| 125. | hypothetical protein                  | 112,051..112,764 | 714  | - | CDS  |
| 126. | hypothetical protein                  | 112,757..113,299 | 543  | - | CDS  |
| 127. | DNA (cytosine-5)-methyltransferase    | 113,296..114,423 | 1128 | - | CDS  |
| 128. | hypothetical protein                  | 114,428..114,736 | 309  | - | CDS  |
| 129. | dATP/dGTP diphosphohydrolase          | 114,733..115,290 | 558  | - | CDS  |
| 130. | hypothetical protein                  | 115,335..115,676 | 342  | - | CDS  |
| 131. | hypothetical protein                  | 115,654..115,959 | 306  | - | CDS  |
| 132. | hypothetical protein                  | 115,960..116,316 | 357  | - | CDS  |
| 133. | ATP-dependent DNA helicase            | 116,313..117,734 | 1422 | - | CDS  |

|      |                                        |                  |      |   |     |
|------|----------------------------------------|------------------|------|---|-----|
| 134. | hypothetical protein                   | 117,724..118,110 | 387  | - | CDS |
| 135. | hypothetical protein                   | 118,117..118,440 | 324  | - | CDS |
| 136. | hypothetical protein                   | 118,440..118,610 | 171  | - | CDS |
| 137. | exodeoxyribonuclease                   | 118,607..119,626 | 1020 | - | CDS |
| 138. | hypothetical protein                   | 119,623..119,982 | 360  | - | CDS |
| 139. | hypothetical protein                   | 120,007..120,159 | 153  | - | CDS |
| 140. | flotillin family protein               | 120,146..121,846 | 1701 | - | CDS |
| 141. | hypothetical protein                   | 121,879..122,373 | 495  | - | CDS |
| 142. | acyl carrier protein                   | 122,363..122,614 | 252  | - | CDS |
| 143. | hypothetical protein                   | 122,602..123,315 | 714  | - | CDS |
| 144. | hypothetical protein                   | 123,318..123,515 | 198  | - | CDS |
| 145. | hypothetical protein                   | 123,531..124,286 | 756  | - | CDS |
| 146. | DNAB-Like Replicative Helicase; ATPase | 124,148..125,272 | 1125 | - | CDS |
| 147. | hypothetical protein                   | 125,250..125,528 | 279  | - | CDS |
| 148. | zinc-finger-containing domain protein  | 125,580..126,146 | 567  | - | CDS |
| 149. | hypothetical protein                   | 126,113..126,370 | 258  | - | CDS |
| 150. | hypothetical protein                   | 126,375..126,728 | 354  | - | CDS |
| 151. | DNA primase/helicase                   | 126,706..127,719 | 1014 | - | CDS |
| 152. | DNA replication factor                 | 127,742..129,058 | 1317 | - | CDS |
| 153. | hypothetical protein                   | 129,055..129,231 | 177  | - | CDS |
| 154. | NinG protein                           | 129,215..129,685 | 471  | - | CDS |
| 155. | hypothetical protein                   | 129,685..129,936 | 252  | - | CDS |
| 156. | DUF4494 domain-contain protein         | 129,929..130,399 | 471  | - | CDS |
| 157. | hypothetical protein                   | 130,411..130,671 | 261  | - | CDS |
| 158. | hypothetical protein                   | 130,740..131,408 | 669  | - | CDS |
| 159. | hypothetical protein                   | 131,405..131,608 | 204  | - | CDS |
| 160. | P63C domain-containing protein         | 131,605..131,793 | 189  | - | CDS |
| 161. | hypothetical protein                   | 131,801..131,953 | 153  | - | CDS |
| 162. | hypothetical protein                   | 131,999..132,265 | 267  | - | CDS |
| 163. | hypothetical protein                   | 132,310..132,480 | 171  | - | CDS |
| 164. | hypothetical protein                   | 132,564..132,815 | 252  | - | CDS |
| 165. | hypothetical protein                   | 132,833..133,129 | 297  | - | CDS |
| 166. | hypothetical protein                   | 133,303..133,614 | 312  | - | CDS |
| 167. | hypothetical protein                   | 133,635..133,886 | 252  | - | CDS |
| 168. | hypothetical protein                   | 133,911..134,294 | 384  | - | CDS |
| 169. | hypothetical protein                   | 134,297..134,605 | 309  | - | CDS |
| 170. | AAA ATPase domain protein              | 134,617..135,414 | 798  | - | CDS |
| 171. | hypothetical protein                   | 135,411..135,632 | 222  | - | CDS |
| 172. | DUF3988 domain-containing protein      | 135,757..136,593 | 837  | - | CDS |
| 173. | hypothetical protein                   | 136,605..137,042 | 438  | - | CDS |
| 174. | Poly A polymerase                      | 137,063..137,725 | 663  | - | CDS |
| 175. | hypothetical protein                   | 137,744..137,998 | 255  | - | CDS |
| 176. | hypothetical protein                   | 138,006..138,482 | 477  | - | CDS |
| 177. | hypothetical protein                   | 138,482..138,706 | 225  | - | CDS |
| 178. | hypothetical protein                   | 138,777..139,958 | 1182 | - | CDS |
| 179. | hypothetical protein                   | 139,963..140,703 | 741  | - | CDS |

|      |                                      |                  |      |   |     |
|------|--------------------------------------|------------------|------|---|-----|
| 180. | hypothetical protein                 | 140,744..141,805 | 1062 | - | CDS |
| 181. | hypothetical protein                 | 141,818..142,108 | 291  | - | CDS |
| 182. | hypothetical protein                 | 142,117..143,013 | 897  | - | CDS |
| 183. | hypothetical protein                 | 143,025..143,279 | 255  | - | CDS |
| 184. | hypothetical protein                 | 143,270..143,575 | 306  | - | CDS |
| 185. | hypothetical protein                 | 143,577..143,969 | 393  | - | CDS |
| 186. | hypothetical protein                 | 144,007..144,357 | 351  | - | CDS |
| 187. | hypothetical protein                 | 144,354..144,605 | 252  | - | CDS |
| 188. | hypothetical protein                 | 144,685..145,083 | 399  | - | CDS |
| 189. | Lys_methyl_FliB super family protein | 145,073..145,546 | 474  | - | CDS |
| 190. | hypothetical protein                 | 145,543..145,815 | 273  | - | CDS |
| 191. | hypothetical protein                 | 145,812..146,195 | 384  | - | CDS |
| 192. | hypothetical protein                 | 146,146..146,439 | 294  | - | CDS |
| 193. | hypothetical protein                 | 146,420..146,704 | 285  | - | CDS |
| 194. | hypothetical protein                 | 146,732..147,043 | 312  | - | CDS |
| 195. | hypothetical protein                 | 147,063..147,536 | 474  | - | CDS |
| 196. | hypothetical protein                 | 147,533..147,787 | 255  | - | CDS |
| 197. | hypothetical protein                 | 147,907..148,140 | 234  | - | CDS |
| 198. | hypothetical protein                 | 148,121..148,546 | 426  | - | CDS |
| 199. | hypothetical protein                 | 148,558..148,716 | 159  | - | CDS |
| 200. | hypothetical protein                 | 148,722..149,036 | 315  | - | CDS |
| 201. | hypothetical protein                 | 149,045..149,392 | 348  | - | CDS |
| 202. | hypothetical protein                 | 149,389..149,793 | 405  | - | CDS |
| 203. | hypothetical protein                 | 149,942..150,061 | 120  | - | CDS |
| 204. | hypothetical protein                 | 150,130..150,390 | 261  | - | CDS |
| 205. | hypothetical protein                 | 150,547..150,669 | 123  | - | CDS |
| 206. | hypothetical protein                 | 150,800..150,985 | 186  | - | CDS |
